# Supplementary material
Source: PubMed Central journal article supplement (PMC6056013)

## LLRR Self-Paced Version

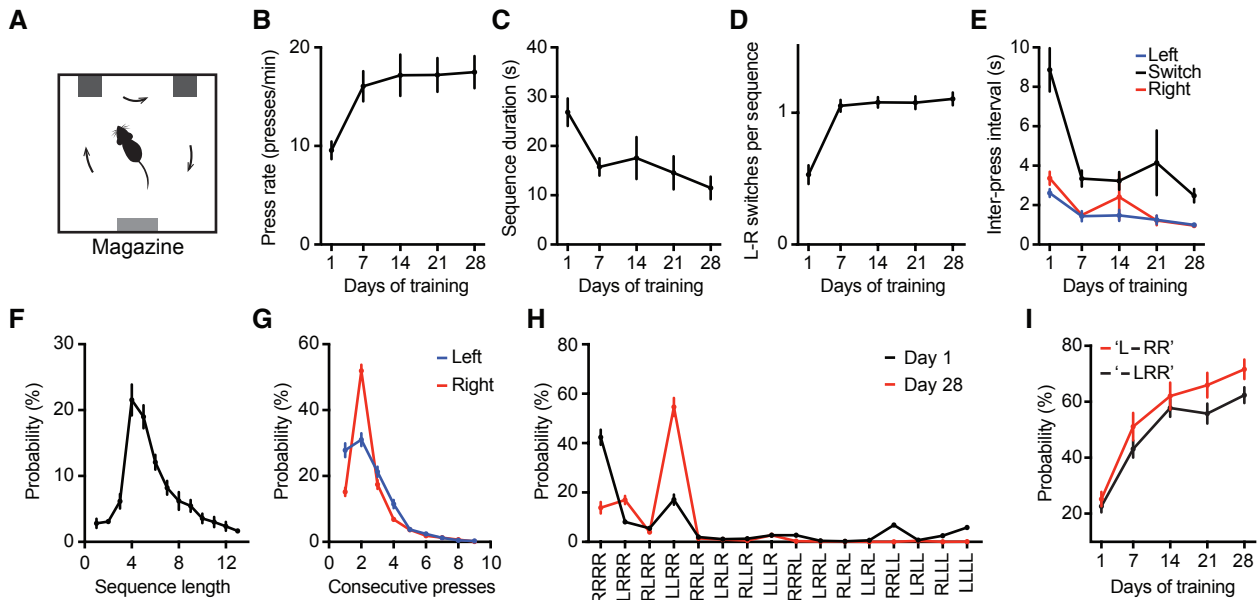

## LLRR Lever-Retraction Version

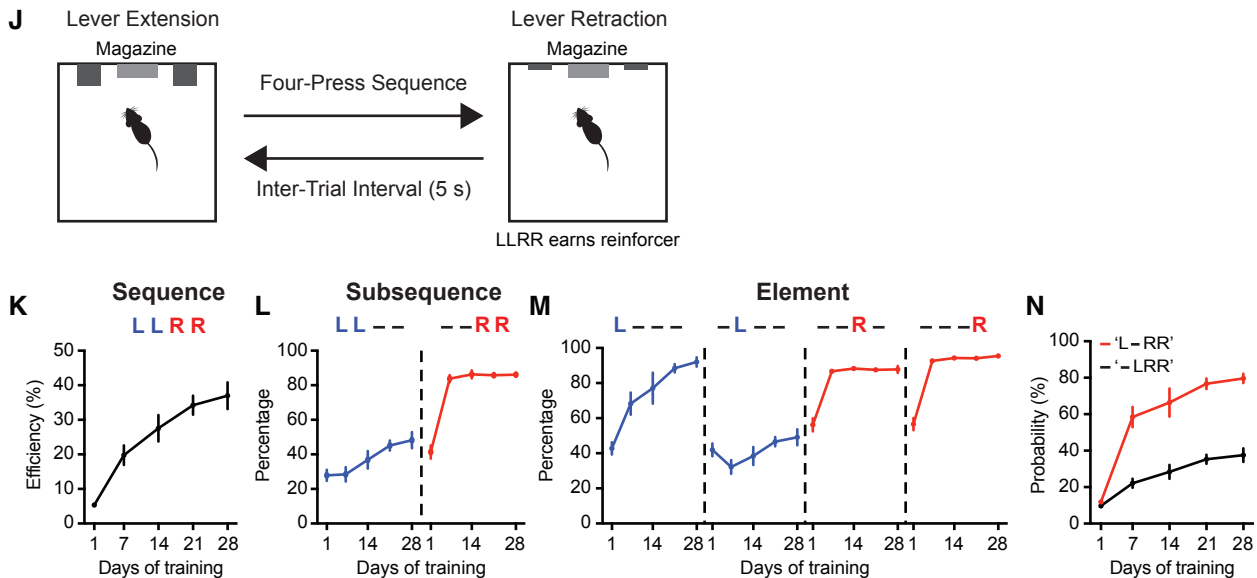

Supplement: NIHMS974299-supplement-1.pdf [file NIHMS974299-supplement-1.pdf]

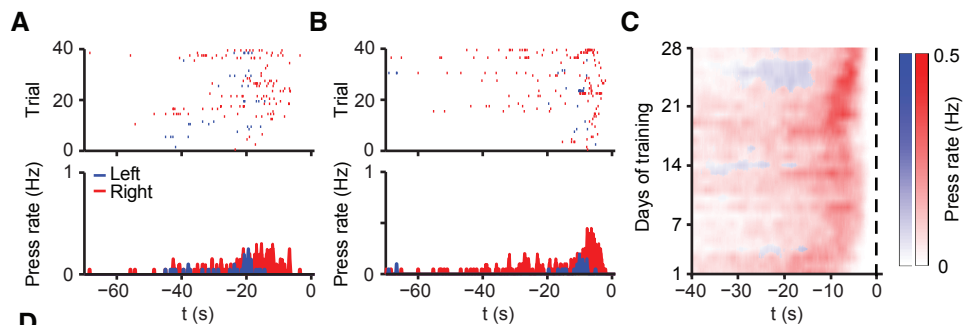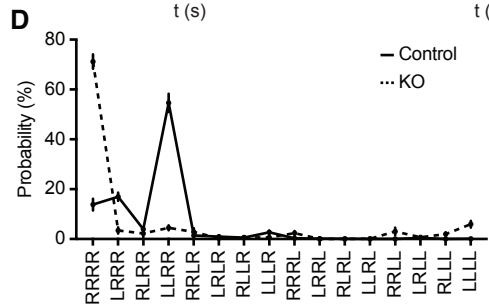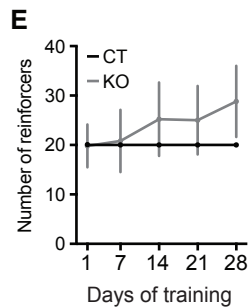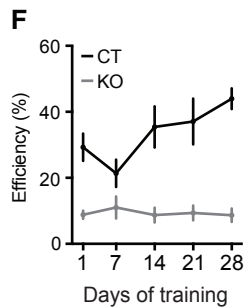

Supplement: NIHMS974299-supplement-2.pdf [file NIHMS974299-supplement-2.pdf]

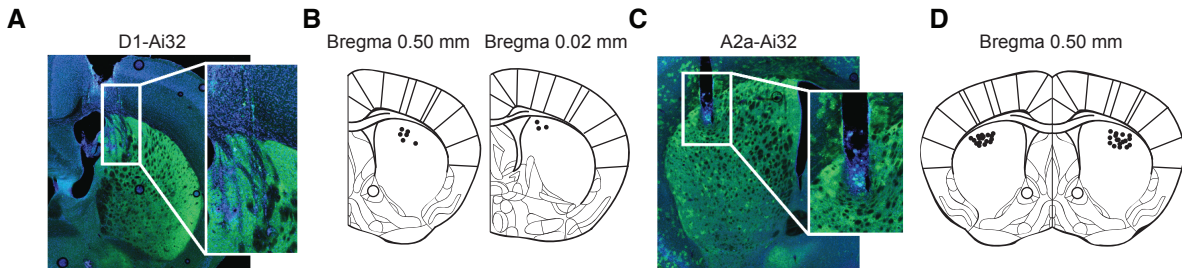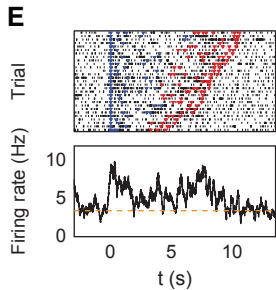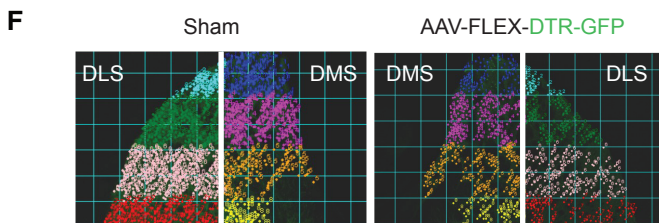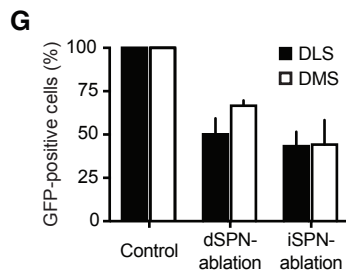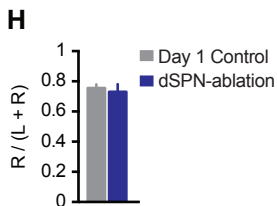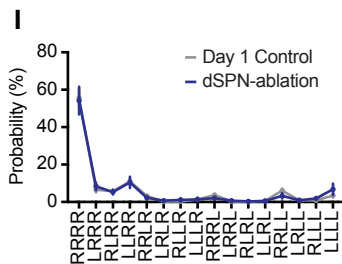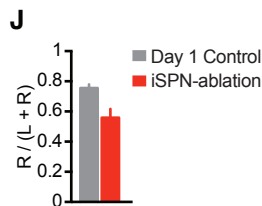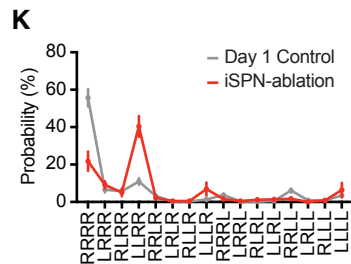

Supplement: NIHMS974299-supplement-3.pdf [file NIHMS974299-supplement-3.pdf]

### dSPN Stimulation

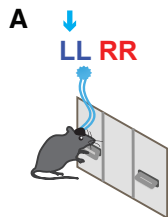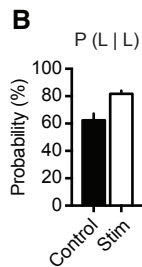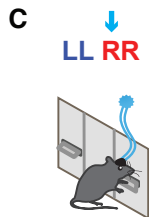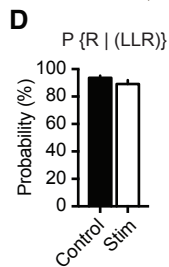

### iSPN Stimulation

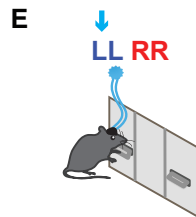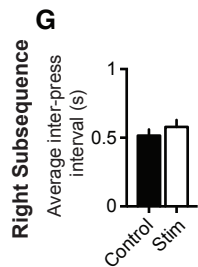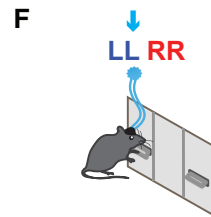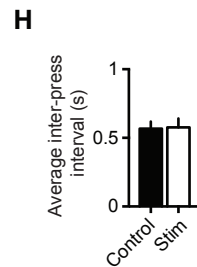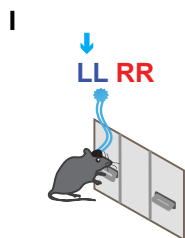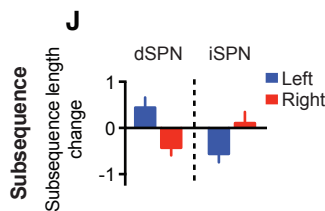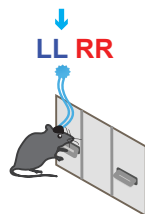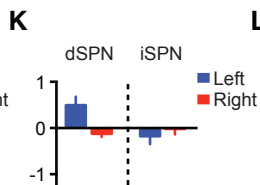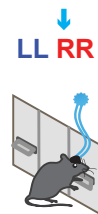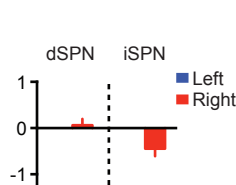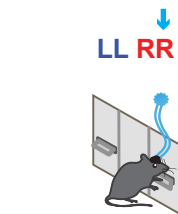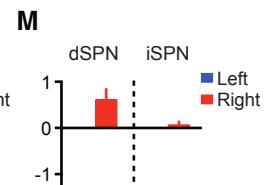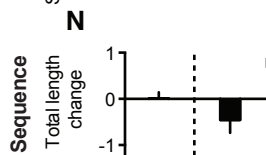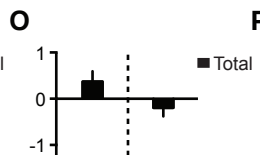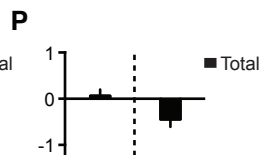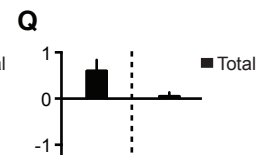

Supplement: NIHMS974299-supplement-4.pdf [file NIHMS974299-supplement-4.pdf]

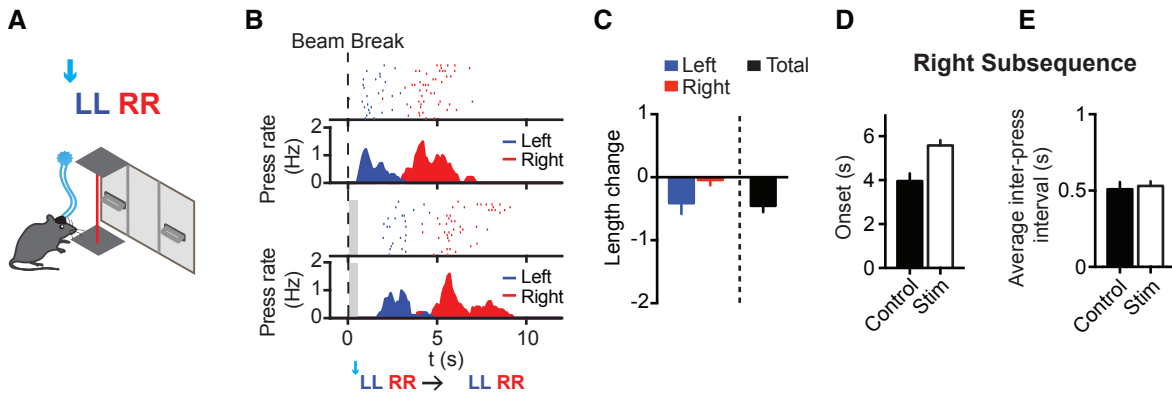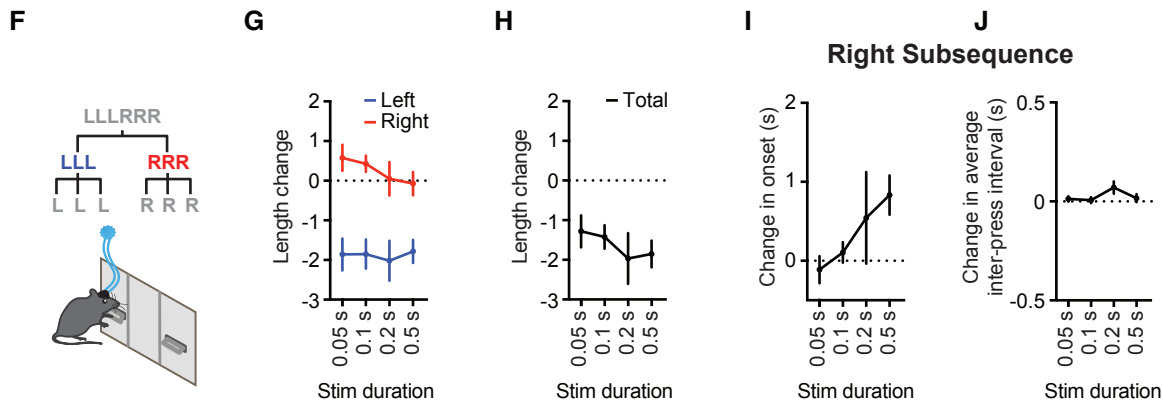

Supplement: NIHMS974299-supplement-5.pdf [file NIHMS974299-supplement-5.pdf]

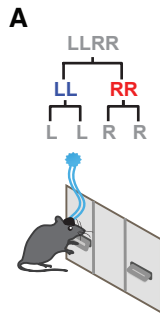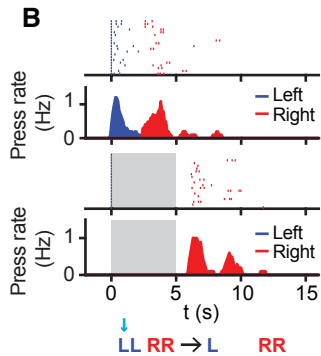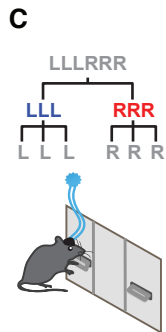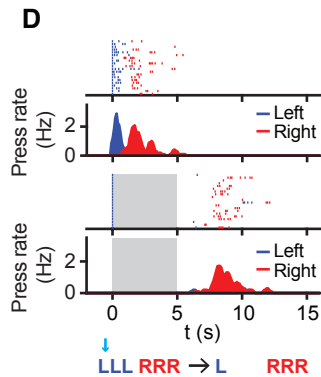

Supplement: NIHMS974299-supplement-6.pdf [file NIHMS974299-supplement-6.pdf]
